# Supplementary material for: Global, regional, and national health inequalities in hepatitis B virus-related liver cancer in 204 countries, 1990-2021
Source: Research Square preprint supplement (doi:10.21203/rs.3.rs-5281121/v1), 2024-10-30
Supplement: Supplementary file 1 [file 9874a5158176ca72135862bd.xlsx]

## Sheet: Sheet1
Region	Prevalence (95% uncertainty interval)			Incidence (95% uncertainty interval)			Deaths (95% uncertainty interval)			DALYs (95% uncertainty interval)
	Counts (2021)	Age-standardised rates per 100,000 (2021)	AAPC (Aaverage annual percentage changes, 95% CI), 1990-2021	Counts (2021)	Age-standardised rates per 100,000 (2021)	AAPC (Aaverage annual percentage changes, 95% CI), 1990-2021	Counts (2021)	Age-standardised rates per 100,000 (2021)	AAPC (Aaverage annual percentage changes, 95% CI), 1990-2021	Counts (2021)	Age-standardised rates per 100,000 (2021)	AAPC (Aaverage annual percentage changes, 95% CI), 1990-2021
Global	288106 (237812,349750)	3.32 (2.74,4.02)	0.185 (0.140,0.230)	206366 (169401,252050)	2.37 (1.95,2.89)	-0.221 (-0.272,-0.171)	181194 (148896,221685)	2.09 (1.72,2.55)	-0.542 (-0.813,-0.270)	5668199 (4706886,6885071)	65.36 (54.43,79.35)	-0.789 (-0.986,-0.592)
High SDI	50881 (41695,60880)	2.86 (2.39,3.37)	0.74 (0.64 - 0.84)	28989 (23732,34830)	1.56 (1.29,1.85)	-0.20 (-0.28 - -0.12)	22541 (18388,27202)	1.17 (0.97,1.4)	-0.79 (-1.13 - -0.46)	577543 (479217,691358)	33.5 (28.16,39.8)	-1.18 (-1.54 - -0.82)
High-middle SDI	76540 (60528,96594)	4.12 (3.27,5.18)	0.44 (0.35 - 0.52)	55363 (43590,70055)	2.92 (2.31,3.69)	0.00 (-0.07 - 0.08)	47895 (37909,60440)	2.5 (1.99,3.16)	-0.38 (-0.77 - 0.02)	1487086 (1177832,1882872)	80.79 (64.35,102.24)	-0.66 (-0.96 - -0.35)
Middle SDI	124473 (99281,157937)	4.38 (3.5,5.54)	-0.10 (-0.21 - -0.00)	92419 (73621,117265)	3.29 (2.63,4.15)	-0.48 (-0.56 - -0.39)	81087 (64898,101641)	2.92 (2.35,3.64)	-0.89 (-1.20 - -0.57)	2582133 (2080861,3255381)	90.66 (73.31,114.04)	-1.01 (-1.31 - -0.70)
Low-middle SDI	22172 (17783,27797)	1.35 (1.08,1.7)	-0.17 (-0.22 - -0.12)	18220 (14529,22911)	1.15 (0.93,1.45)	-0.23 (-0.28 - -0.18)	18249 (14603,23064)	1.18 (0.95,1.49)	-0.26 (-0.37 - -0.14)	615623 (494362,769789)	36.97 (29.77,46.5)	-0.32 (-0.48 - -0.16)
Low SDI	13952 (10532,18465)	2.15 (1.6,2.84)	-1.02 (-1.11 - -0.94)	11303 (8431,14885)	1.9 (1.42,2.52)	-1.11 (-1.21 - -1.02)	11352 (8479,14986)	1.97 (1.47,2.62)	-1.12 (-1.29 - -0.95)	403657 (304906,539507)	60.42 (45.26,80.28)	-1.07 (-1.23 - -0.91)
Central Europe, eastern Europe, and central Asia
Central Asia	1671 (1175,2317)	1.77 (1.25,2.44)	-1.04 (-1.20 - -0.88)	1399 (971,1939)	1.54 (1.07,2.12)	-0.99 (-1.11 - -0.87)	1405 (966,1957)	1.57 (1.09,2.19)	-0.96 (-1.22 - -0.70)	46762 (32879,65100)	49.19 (34.95,67.8)	-1.10 (-1.52 - -0.67)
Central Europe	1433 (1008,1929)	0.74 (0.53,0.98)	-0.48 (-0.56 - -0.40)	1277 (901,1745)	0.63 (0.45,0.84)	-0.58 (-0.67 - -0.49)	1312 (925,1811)	0.64 (0.45,0.85)	-0.65 (-1.07 - -0.23)	34676 (24323,46549)	18.42 (13.39,24.37)	-0.82 (-1.23 - -0.41)
Eastern Europe	1919 (1581,2322)	0.62 (0.52,0.74)	0.52 (0.26 - 0.77)	1646 (1353,2005)	0.51 (0.43,0.61)	0.46 (0.24 - 0.68)	1655(1366,2007)	0.51 (0.42,0.61)	0.32 (-0.31 - 0.95)	49543 (40976,60028)	16.38 (13.75,19.57)	0.39 (-0.56 - 1.35)
High-income
Australasia	641 (447,879)	1.47 (1.06,1.99)	3.83 (3.56 - 4.09)	377 (264,529)	0.82 (0.58,1.12)	2.93 (2.72 - 3.14)	305 (212,431)	0.63 (0.44,0.88)	2.47 (2.11 - 2.83)	8371 (5831,11518)	19.25 (13.63,25.77)	2.26 (1.92 - 2.61)
High-income Asia Pacific	28834 (23518,35027)	8.13 (6.69,9.98)	0.25 (0.18 - 0.32)	14818 (11974,18163)	3.96 (3.23,4.84)	-1.02 (-1.13 - -0.92)	10739 (8625,13128)	2.72 (2.21,3.32)	-1.91 (-2.16 - -1.66)	260757 (212393,320315)	77.46 (63.56,95.58)	-2.28 (-2.53 - -2.03)
High-income North America	6208 (5193,7352)	1.13 (0.96,1.33)	2.88 (2.82 - 2.95)	3795 (3138,4502)	0.65 (0.55,0.76)	2.30 (2.21 - 2.40)	2839 (2330,3359)	0.46 (0.39,0.55)	1.93 (1.65 - 2.21)	75464 (62786,89779)	13.61 (11.55,16.03)	1.77 (1.61 - 1.92)
Southern Latin America	322 (228,450)	0.39 (0.28,0.53)	2.38 (2.30 - 2.45)	273 (189,390)	0.32 (0.23,0.46)	2.19 (2.07 - 2.30)	273 (188,392)	0.32 (0.22,0.46)	2.19 (1.76 - 2.62)	7490 (5328,10345)	9.11 (6.53,12.54)	2.04 (1.26 - 2.83)
Western Europe	9017 (6621,12082)	1.24 (0.92,1.66)	2.12 (2.02 - 2.21)	5487 (4017,7392)	0.7 (0.52,0.93)	1.16 (1.05 - 1.27)	4638 (3414,6338)	0.55 (0.41,0.74)	0.60 (0.33 - 0.87)	114155 (83113,152787)	15.8 (11.66,21.06)	0.47 (0.20 - 0.75)
Latin America and Caribbean
Andean Latin America	649 (463,875)	1.05 (0.75,1.43)	-0.51 (-0.61 - -0.42)	566 (400,777)	0.94 (0.66,1.31)	-0.54 (-0.64 - -0.45)	588 (412,817)	0.99 (0.69,1.38)	-0.55 (-1.12 - 0.01)	16688 (11895,22492)	26.89 (19.13,36.33)	-0.71 (-1.27 - -0.15)
Caribbean	280 (199,377)	0.53 (0.38,0.71)	-0.38 (-0.53 - -0.22)	234 (165,317)	0.44 (0.31,0.59)	-0.53 (-0.69 - -0.37)	236 (166,319)	0.44 (0.31,0.6)	-0.60 (-0.92 - -0.29)	7122 (5166,9525)	13.46 (9.85,17.86)	-0.48 (-0.80 - -0.16)
Central Latin America	1033 (780,1363)	0.4 (0.3,0.52)	-0.71 (-0.85 - -0.58)	869 (648,1159)	0.34 (0.25,0.45)	-0.84 (-0.96 - -0.72)	885 (655,1190)	0.35 (0.26,0.47)	-0.83 (-1.47 - -0.19)	26897 (20334,35081)	10.29 (7.8,13.42)	-0.93 (-1.56 - -0.30)
Tropical Latin America	1087 (911,1281)	0.41 (0.35,0.49)	0.15 (0.05 - 0.25)	915 (764,1081)	0.35 (0.29,0.41)	0.12 (-0.07 - 0.30)	925 (771,1095)	0.36 (0.3,0.42)	0.13 (-0.49 - 0.76)	28607 (24045,33530)	10.92 (9.21,12.78)	-0.04 (-0.69 - 0.61)
North Africa and Middle East
North Africa and Middle East	7734 (5904,9871)	1.47 (1.12,1.89)	0.08 (0.00 - 0.15)	6304 (4749,8154)	1.26 (0.95,1.64)	-0.05 (-0.12 - 0.02)	6219 (4681,8079)	1.28 (0.97,1.67)	-1.17 (-1.33 - -1.01)	198545 (151320,254188)	36.99 (28,47.77)	-0.21 (-0.44 - 0.02)
South Asia
South Asia	16612 (14072,19676)	1.01 (0.85,1.2)	0.61 (0.55 - 0.67)	14004 (11808,16800)	0.88 (0.74,1.06)	0.57 (0.52 - 0.63)	14172 (11904,16996)	0.91 (0.76,1.08)	0.51 (0.22 - 0.80)	456529 (386460,542190)	27.34 (23.17,32.57)	0.47 (0.18 - 0.75)
Southeast Asia, east Asia, and Oceania
East Asia	170204 (134132,220264)	8.03 (6.35,10.35)	0.10 (-0.01 - 0.22)	122180 (95829,157144)	5.7 (4.49,7.29)	-0.42 (-0.51 - -0.34)	103358 (80924,132256)	4.81 (3.78,6.13)	-0.93 (-1.37 - -0.47)	3247052 (2546030,4193951)	155.12 (122.1,199.6)	-0.99 (-1.47 - -0.51)
Oceania	185 (114,364)	1.92 (1.18,3.82)	-1.02 (-1.08 - -0.96)	149 (91,297)	1.66 (1.01,3.31)	-1.10 (-1.16 - -1.04)	147 (90,294)	1.69 (1.02,3.36)	-1.17 (-1.33 - -1.01)	5234 (3173,10386)	52.62 (32.1,104.9)	-1.15 (-1.31 - -0.98)
Southeast Asia	22295 (16419,30338)	3.01 (2.22,4.1)	-0.51 (-0.56 - -0.46)	17701 (12864,24371)	2.46 (1.79,3.36)	-0.70 (-0.75 - -0.64)	17132 (12364,23546)	2.42 (1.77,3.3)	0.51 (0.22 - 0.80)	564561 (418982,764927)	75.45 (56.02,103.41)	-0.91 (-1.03 - -0.79)
Sub-Saharan Africa
Central Sub-Saharan Africa	937 (420,2266)	1.19 (0.53,2.86)	-1.51 (-1.62 - -1.40)	731 (326,1739)	1.02 (0.45,2.45)	-1.58 (-1.69 - -1.47)	724 (321,1761)	1.05 (0.46,2.57)	-1.59 (-1.75 - -1.42)	27733 (12495,68108)	34.09 (15.13,82.82)	-1.60 (-1.80 - -1.40)
Eastern Sub-Saharan Africa	3812 (2642,5670)	1.68 (1.15,2.57)	-0.64 (-0.71 - -0.56)	3087 (2121,4672)	1.5 (1.02,2.33)	-0.70 (-0.78 - -0.62)	3089 (2115,4708)	1.55 (1.06,2.41)	-0.73 (-0.85 - -0.61)	112354 (77316,168604)	47.77 (32.6,72.96)	-0.71 (-0.81 - -0.61)
Southern Sub-Saharan Africa	2093 (1677,2626)	2.94 (2.37,3.69)	0.78 (0.56 - 1.00)	1661 (1331,2098)	2.48 (1.97,3.11)	0.81 (0.61 - 1.01)	1641 (1309,2073)	2.51 (1.99,3.15)	0.95 (0.57 - 1.33)	60372 (48435,76245)	83.78 (67.36,105.61)	0.89 (0.46 - 1.32)
Western Sub-Saharan Africa	11142 (8563,14101)	4.26 (3.25,5.39)	-1.41 (-1.52 - -1.30)	8892 (6802,11252)	3.77 (2.9,4.73)	-1.45 (-1.55 - -1.34)	8912 (6856,11346)	3.92 (3.03,4.93)	-1.45 (-1.59 - -1.30)	319286 (246128,406002)	118.26 (90.79,149.89)	-1.49 (-1.64 - -1.34)
